# Supplementary material
Source: PubMed Central journal article supplement (PMC3094484)
Supplement: NIHMS290072-supplement-1_si_001.pdf [file NIHMS290072-supplement-1_si_001.pdf]

Supporting Information

# A Comprehensive Compositional Analysis of Heparin/Heparan Sulfate-Derived Disaccharides from Human Serum

*Wei Wei<sup>†</sup>, Milady R. Niñonuevo<sup>‡</sup>, Anish Sharma<sup>‡</sup>, Lieza M. Danan-Leon<sup>†||</sup>, Julie A. Leary<sup>\*‡</sup>*

Department of Molecular and Cellular Biology, University of California, Davis, CA 95616

\*Corresponding author. E-mail: [jaleary@ucdavis.edu](mailto:jaleary@ucdavis.edu) Fax: (530) 752-3085

<sup>†</sup>Department of Chemistry, University of California, Davis, CA 95616

<sup>‡</sup>Department of Molecular and Cellular Biology, University of California, Davis, CA 95616

<sup>§</sup>Mass Spectrometry Facility, University of California, Davis, CA 95616

<sup>||</sup>Current address: Lancaster Laboratories, Lancaster, PA 17605-2425

## Table of contents

Method validation using serum spiked with heparin sulfate from bovine kidney.....Page S-2

**Table S-1.** Method validation using serum spiked with heparin sulfate from bovine kidney.

|       | m/z                 | Ref. <sup>S1</sup><br>(%) | Expt'l<br>(%) | Diff.<br>(%) |
|-------|---------------------|---------------------------|---------------|--------------|
| IV-A  | 378.1 <sup>1-</sup> | 50.1                      | 48.9 ± 1.5    | -1.2         |
| III-A | 458.1 <sup>1-</sup> | 0.0                       | 0.3 ± 0.1     | 0.3          |
| II-A  | 458.1 <sup>1-</sup> | 14.1                      | 14.6 ± 2.0    | 0.5          |
| I-A   | 268.7 <sup>2-</sup> | 0.7                       | 0.4 ± 0.1     | -0.3         |
| IV-S  | 416.1 <sup>1-</sup> | 16.6                      | 13.0 ± 0.6    | -3.6         |
| III-S | 247.7 <sup>2-</sup> | 2.9                       | 5.9 ± 0.5     | 3.0          |
| II-S  | 247.7 <sup>2-</sup> | 5.1                       | 5.9 ± 1.7     | 0.8          |
| I-S   | 191.5 <sup>3-</sup> | 6.4                       | 7.2 ± 2.9     | 0.8          |
| I-H   | 247.7 <sup>2-</sup> | 0.0                       | 1.6 ± 1.1     | 1.6          |
| II-H  | 416.1 <sup>1-</sup> | 2.2                       | 1.6 ± 0.2     | -0.6         |
| III-H | 416.1 <sup>1-</sup> | 0.0                       | 0.4 ± 0.7     | 0.4          |
| IV-H  | 336.3 <sup>1-</sup> | 1.3                       | 0.2 ± 0.1     | -1.1         |

**Reference:**

(S1) Saad, O. M.; Ebel, H.; Uchimura, K.; Rosen, S. D.; Bertozzi, C. R.; Leary, J. A. *Glycobiology* **2005**, *15*, 818-826.
